# Supplementary material
Source: PubMed Central journal article supplement (PMC3039380)
Supplement: supp_M110.174938_jbc.M110.174938-1.pdf [file supp_M110.174938_jbc.M110.174938-1.pdf]

**Table S1.** GLUT4, GLUT1, hexokinase II, AMPK $\alpha$ 1, AMPK $\alpha$ 2, CaMK II, IRS1, Akt, AS160, TBC1D1 protein levels and glycogen concentrations were measured in tibialis anterior muscles one week following intramuscular injection of empty vector control (Empty vector) or wild type Myo1c (WT-Myo1c) DNA constructs. Protein abundance is expressed relative to the average of Empty vector control. Data are means  $\pm$  S.E., ‡ P < 0.01 vs. Empty vector. N = 8/ group.

|                      |                               | Empty vector    | WT-Myo1c          |
|----------------------|-------------------------------|-----------------|-------------------|
| Immunoblot<br>(A.U.) | Myo1c                         | 1.00 $\pm$ 0.07 | 7.10 $\pm$ 0.79 ‡ |
|                      | GLUT4                         | 1.00 $\pm$ 0.04 | 0.99 $\pm$ 0.06   |
|                      | GLUT1                         | 1.00 $\pm$ 0.10 | 1.07 $\pm$ 0.04   |
|                      | Hexokinase II                 | 1.00 $\pm$ 0.06 | 1.11 $\pm$ 0.09   |
|                      | AMPK $\alpha$ 1               | 1.00 $\pm$ 0.05 | 1.06 $\pm$ 0.10   |
|                      | AMPK $\alpha$ 2               | 1.00 $\pm$ 0.03 | 0.97 $\pm$ 0.03   |
|                      | CaMK II                       | 1.00 $\pm$ 0.04 | 1.08 $\pm$ 0.06   |
|                      | IRS1                          | 1.00 $\pm$ 0.15 | 1.12 $\pm$ 0.14   |
|                      | Akt                           | 1.00 $\pm$ 0.05 | 1.02 $\pm$ 0.05   |
|                      | AS160                         | 1.00 $\pm$ 0.08 | 0.97 $\pm$ 0.07   |
|                      | TBC1D1                        | 1.00 $\pm$ 0.09 | 1.01 $\pm$ 0.04   |
|                      | Glycogen<br>(nmol/mg protein) |                 | 59.9 $\pm$ 4.69   |
