# Supplementary material
Source: PubMed Central journal article supplement (PMC3039380)
Supplement: supp_M110.174938_jbc.M110.174938-3.pdf [file supp_M110.174938_jbc.M110.174938-3.pdf]

**Table S3.** GLUT4, GLUT1, hexokinase II, AMPK $\alpha$ 1, AMPK $\alpha$ 2, CaMK II, IRS1, Akt, AS160, TBC1D1 protein levels and glycogen concentrations in tibialis anterior muscles one week following intramuscular injection of empty vector control (Empty vector) or inactive Myo1c (K111A-Myo1c) DNA constructs. Protein abundance is expressed relative to the average of Empty vector control. Data are means  $\pm$  S.E., ‡ P < 0.01 vs. Empty vector. N = 8/ group

|                               |                 | Empty vector    | K111A-Myo1c       |
|-------------------------------|-----------------|-----------------|-------------------|
| Immunoblot<br>(A.U.)          | Myo1c           | 1.00 $\pm$ 0.08 | 1.85 $\pm$ 0.25 ‡ |
|                               | GLUT4           | 1.00 $\pm$ 0.04 | 1.03 $\pm$ 0.06   |
|                               | GLUT1           | 1.00 $\pm$ 0.07 | 1.07 $\pm$ 0.04   |
|                               | Hexokinase II   | 1.00 $\pm$ 0.08 | 1.02 $\pm$ 0.09   |
|                               | AMPK $\alpha$ 1 | 1.00 $\pm$ 0.05 | 0.94 $\pm$ 0.04   |
|                               | AMPK $\alpha$ 2 | 1.00 $\pm$ 0.06 | 1.05 $\pm$ 0.05   |
|                               | CaMK II         | 1.00 $\pm$ 0.05 | 1.07 $\pm$ 0.05   |
|                               | IRS1            | 1.00 $\pm$ 0.10 | 0.98 $\pm$ 0.07   |
|                               | Akt             | 1.00 $\pm$ 0.06 | 1.01 $\pm$ 0.03   |
|                               | AS160           | 1.00 $\pm$ 0.05 | 0.95 $\pm$ 0.08   |
|                               | TBC1D1          | 1.00 $\pm$ 0.11 | 1.03 $\pm$ 0.13   |
| Glycogen<br>(nmol/mg protein) |                 | 43.1 $\pm$ 2.51 | 46.5 $\pm$ 5.25   |
