# Supplementary material
Source: PubMed Central journal article supplement (PMC3039380)
Supplement: supp_M110.174938_jbc.M110.174938-4.pdf [file supp_M110.174938_jbc.M110.174938-4.pdf]

**Table S4.** Immunoblot quantitation of pAMPK Thr<sup>172</sup>, PAS at 160 kDa, pCaMKII Thr<sup>286</sup>, pACC Ser<sup>212</sup>, pIRS1 Tyr<sup>612</sup>, pAkt Thr<sup>308</sup>, and pAkt Ser<sup>473</sup> abundance in tibialis anterior muscles one week following intramuscular injection of empty vector control (Empty) or inactive Myo1c (K111A-Myo1c) DNA constructs. Mice were anesthetized and muscles were stimulated to contract in situ for 15 min (Ctx) or sham operated (Basal) (Upper panel). Additional mice were injected with maximal insulin (16.6 U/kg insulin) and glucose to prevent hypoglycemia (Ins+Glu) or saline (Saline), and 15 min after injection, muscles were harvested to assess proteins abundance (Lower panel). Protein abundance is expressed relative to the average of Empty vector control (Basal or Saline). Data are means  $\pm$  S.E., \* P < 0.05, \*\* P < 0.01 vs. Basal or Saline. N = 10-11 / group.

| Immunoblot                 | Empty vector    |                    | K111A-Myo1c     |                    |
|----------------------------|-----------------|--------------------|-----------------|--------------------|
|                            | Basal           | Ctx                | Basal           | Ctx                |
| pAMPK Thr <sup>172</sup>   | 1.00 $\pm$ 0.05 | 2.03 $\pm$ 0.17 ** | 1.06 $\pm$ 0.07 | 2.32 $\pm$ 0.29 ** |
| PAS at 160 kDa             | 1.00 $\pm$ 0.14 | 1.84 $\pm$ 0.23 *  | 0.83 $\pm$ 0.13 | 2.23 $\pm$ 0.34 ** |
| pCaMKII Thr <sup>286</sup> | 1.00 $\pm$ 0.06 | 1.21 $\pm$ 0.09    | 0.95 $\pm$ 0.06 | 1.19 $\pm$ 0.09 *  |
| pACC Ser <sup>212</sup>    | 1.00 $\pm$ 0.08 | 2.20 $\pm$ 0.28 ** | 0.90 $\pm$ 0.08 | 2.43 $\pm$ 0.20 ** |
|                            | Saline          | Ins + Glu          | Saline          | Ins + Glu          |
| pIRS1 Tyr <sup>612</sup>   | 1.00 $\pm$ 0.03 | 3.09 $\pm$ 0.17 ** | 1.09 $\pm$ 0.06 | 3.26 $\pm$ 0.33 ** |
| pAkt Thr <sup>308</sup>    | 1.00 $\pm$ 0.06 | 7.19 $\pm$ 0.39 ** | 1.00 $\pm$ 0.05 | 6.79 $\pm$ 0.58 ** |
| pAkt Ser <sup>473</sup>    | 1.00 $\pm$ 0.12 | 8.71 $\pm$ 0.51 ** | 0.96 $\pm$ 0.06 | 8.30 $\pm$ 0.53 ** |
| PAS at 160 kDa             | 1.00 $\pm$ 0.11 | 3.83 $\pm$ 0.74 ** | 1.52 $\pm$ 0.16 | 3.61 $\pm$ 0.39 ** |
